# Supplementary material
Source: PubMed Central journal article supplement (PMC8982843)

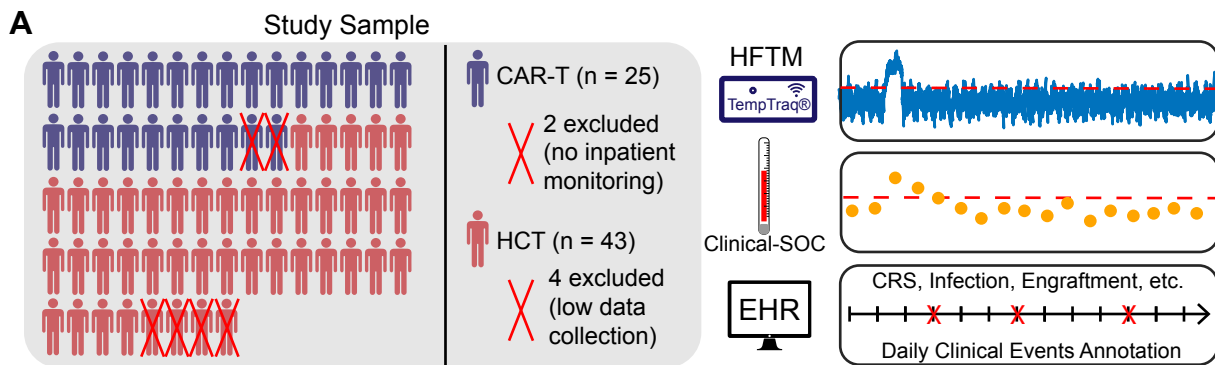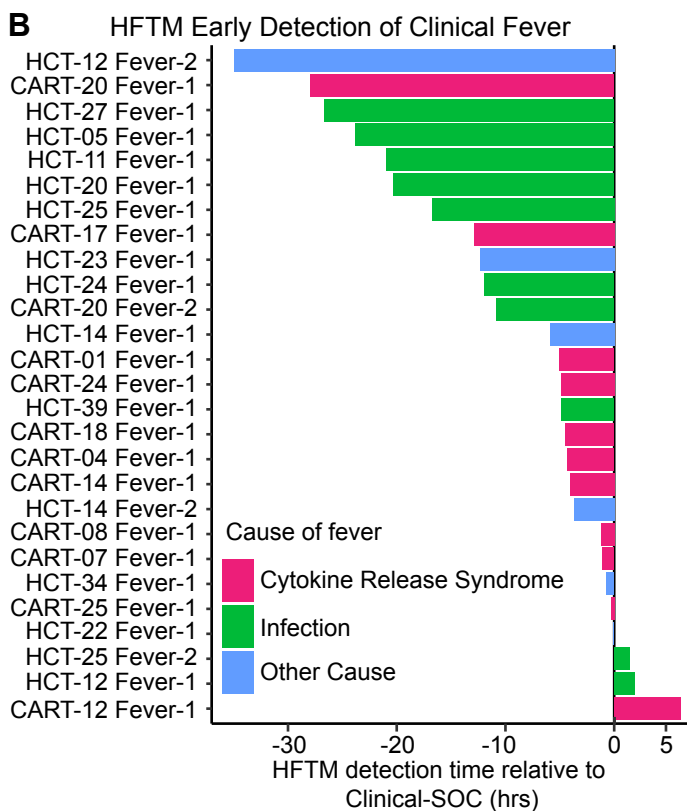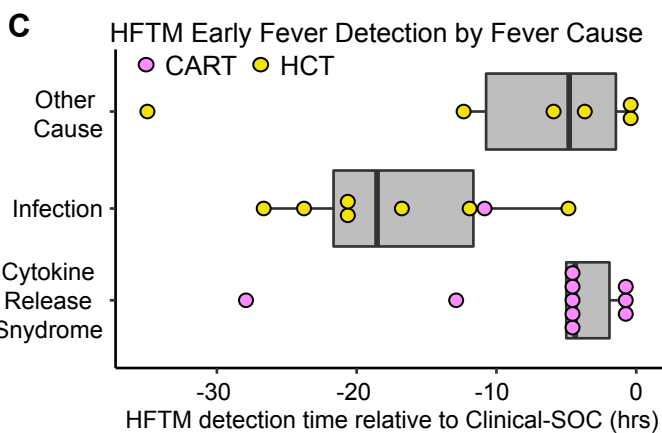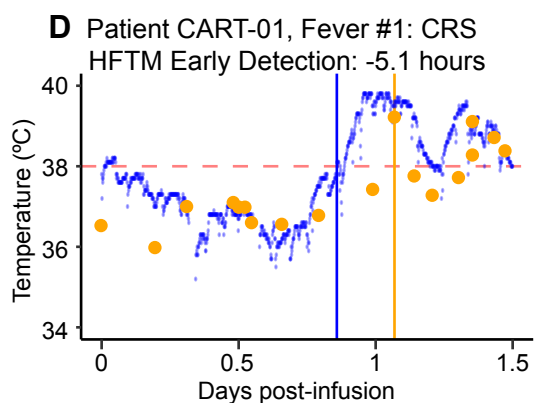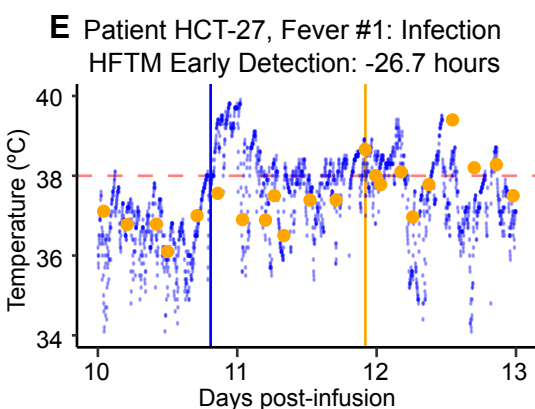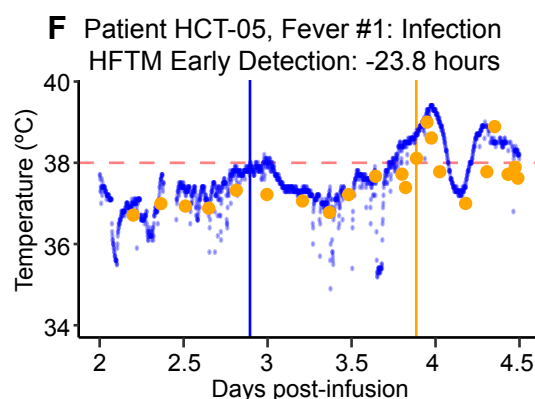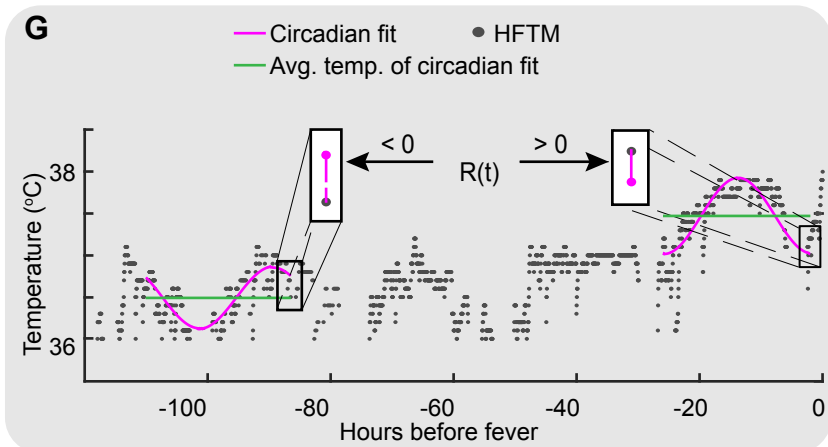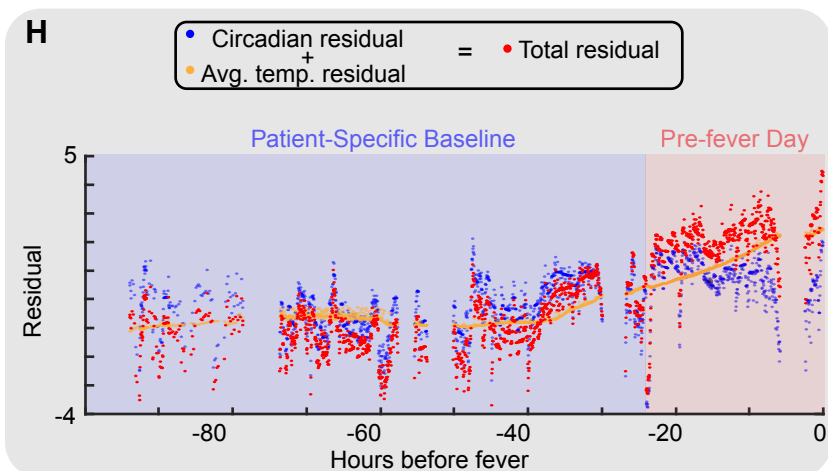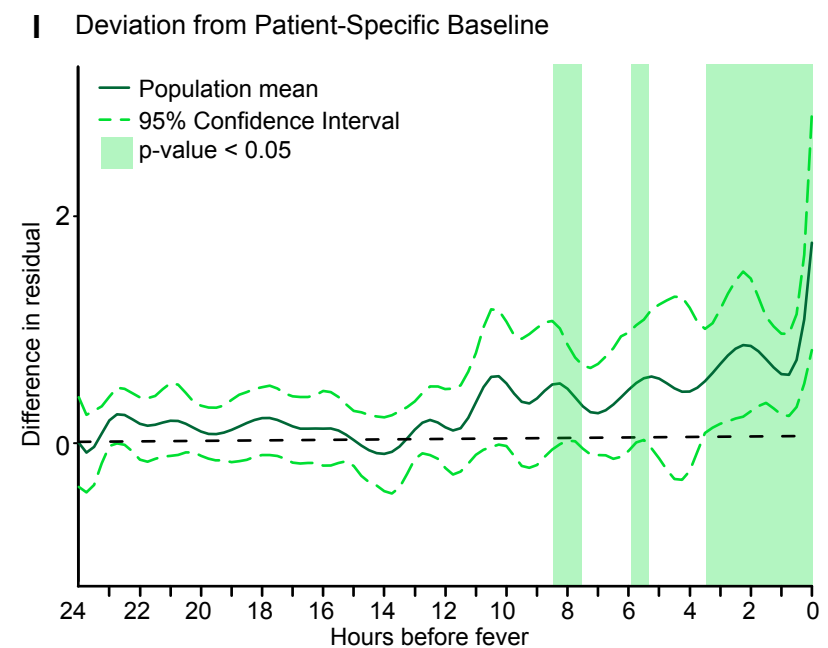

Supplement: NIHMS1786279-supplement-Figure_S1.pdf [file NIHMS1786279-supplement-Figure_S1.pdf]
